# Supplementary material for: A programmable DNA-origami platform for studying protein-mediated lipid transfer between bilayers
Source: bioRxiv or medRxiv preprint supplement (doi:10.1101/610212), 2019-04-15

**a**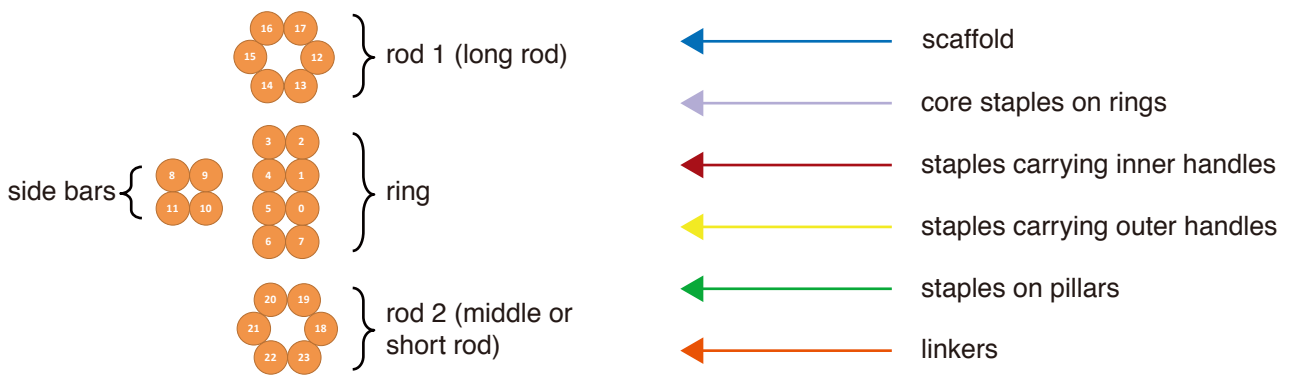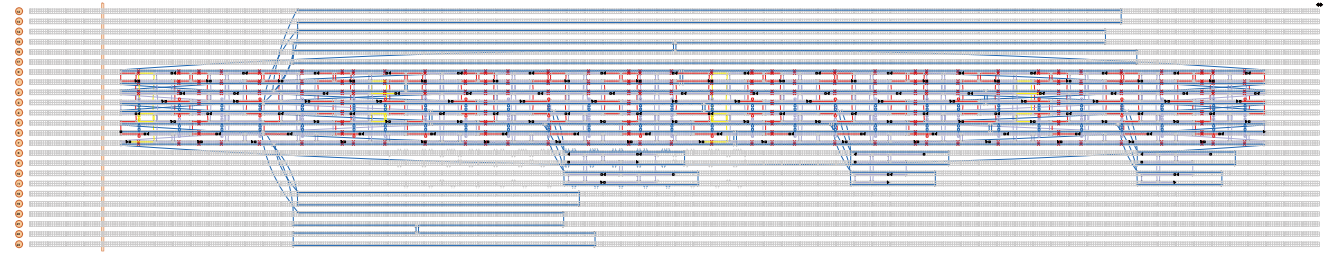**b**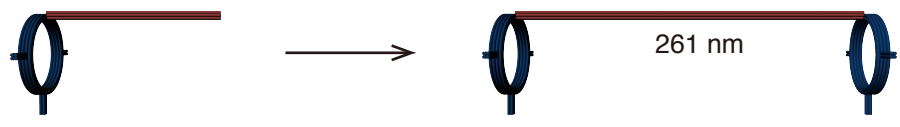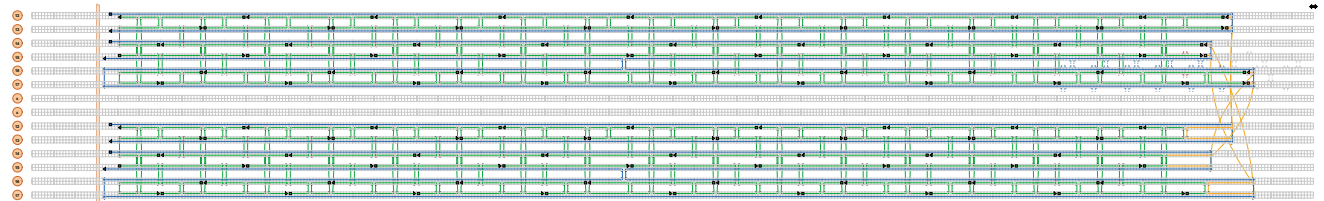**c**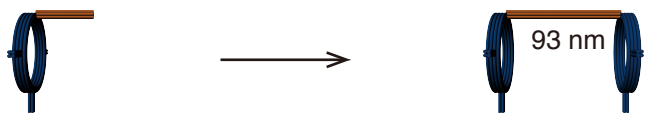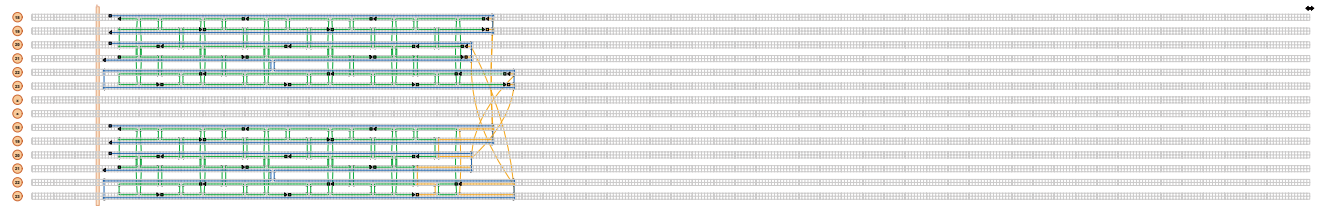**d**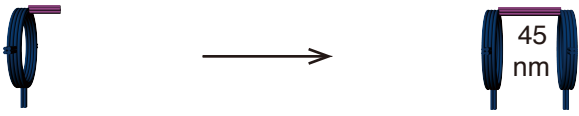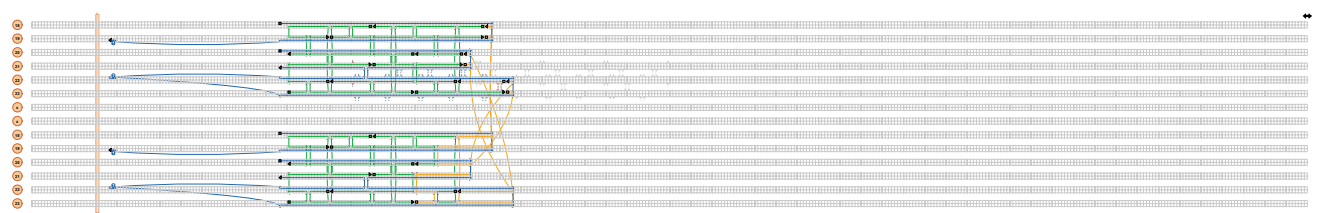

Supplement: Supplementary file [file media-1.pdf]
