# Supplementary material for: A programmable DNA-origami platform for studying protein-mediated lipid transfer between bilayers
Source: bioRxiv or medRxiv preprint supplement (doi:10.1101/610212), 2019-04-15

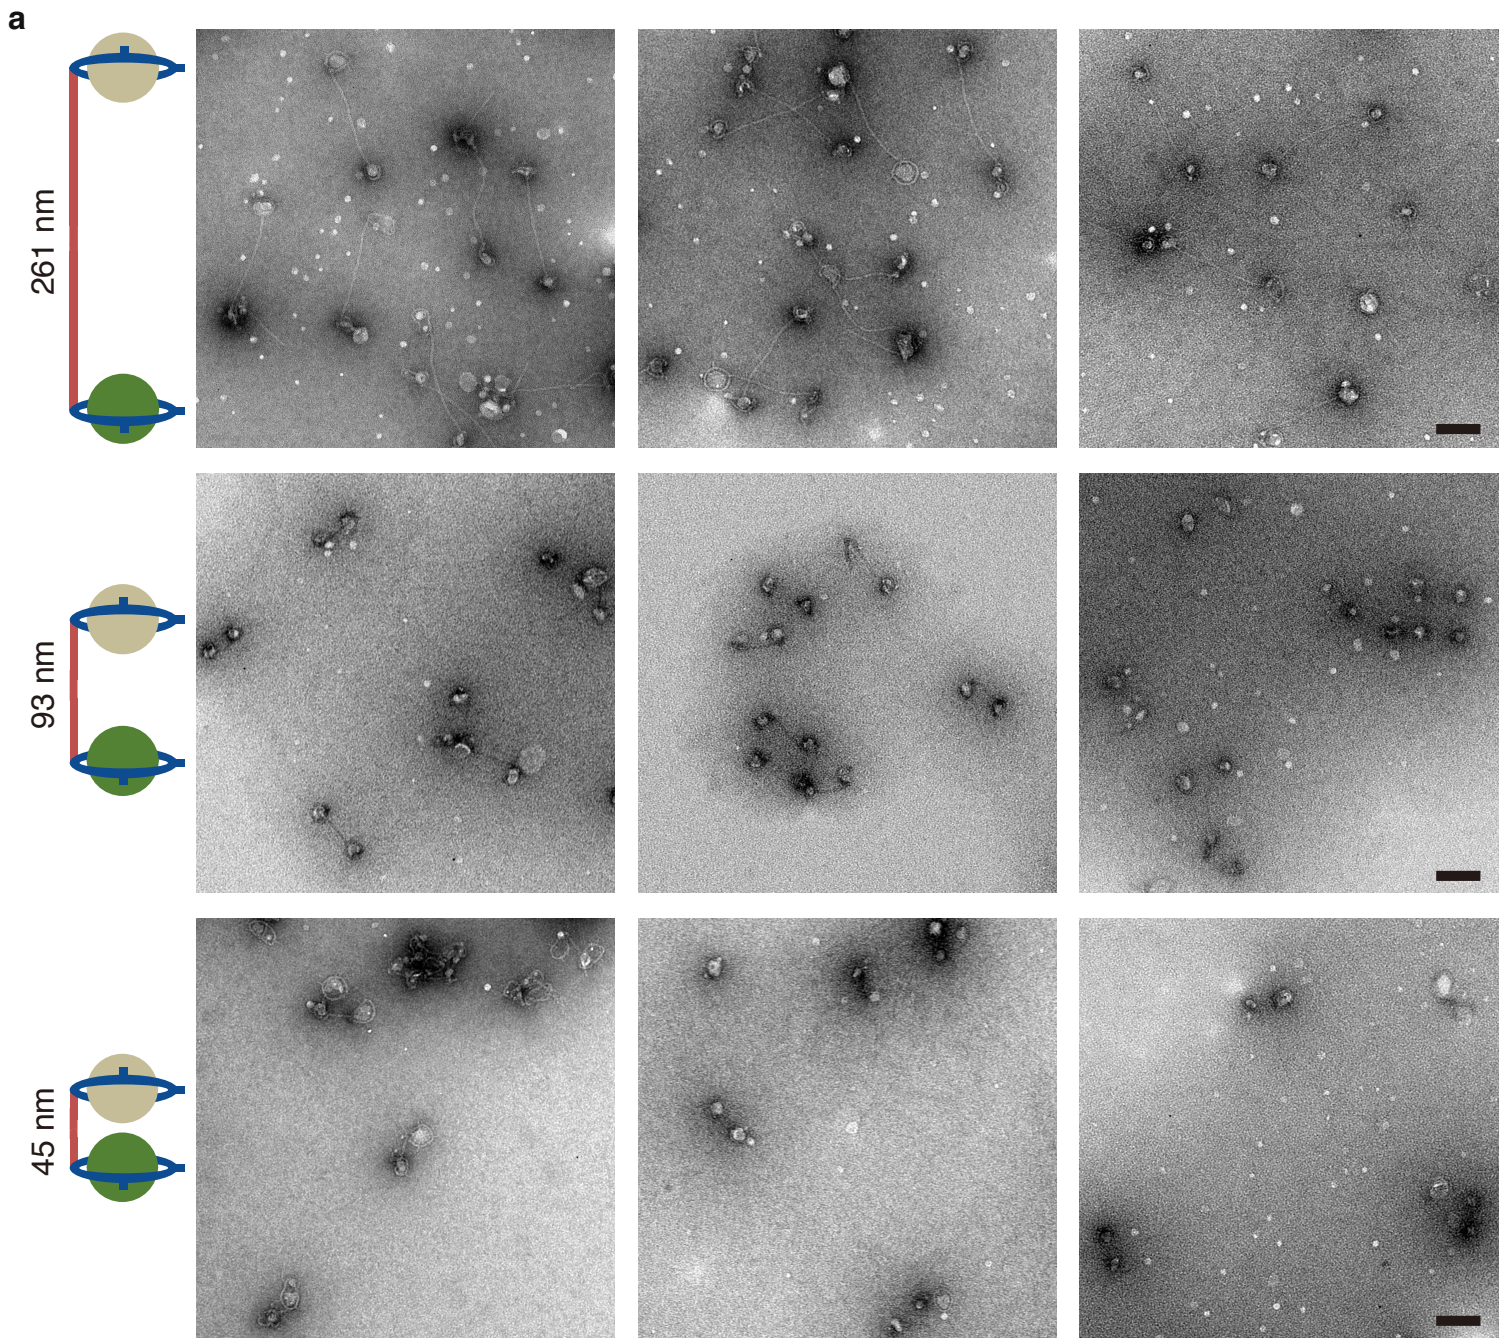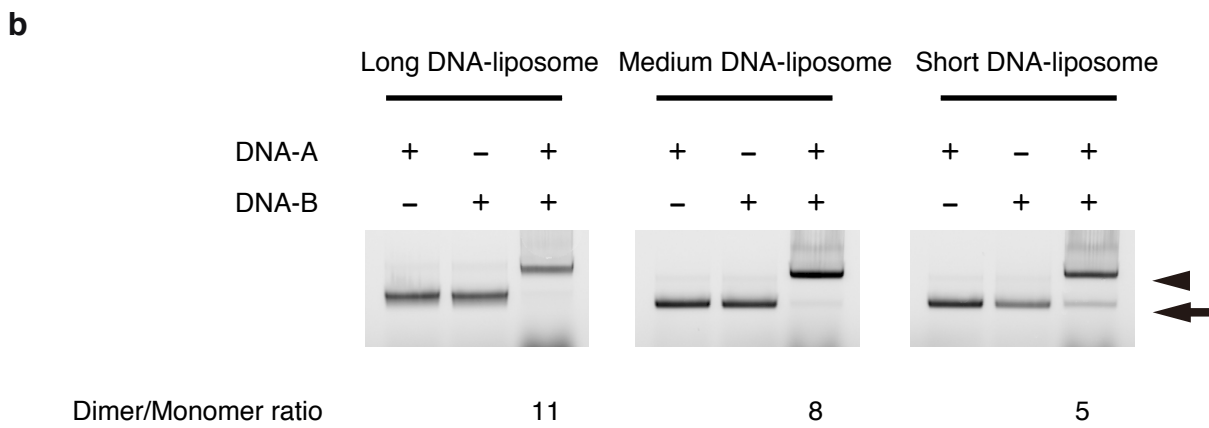

Supplement: Supplementary file [file media-3.pdf]
